# Supplementary material
Source: PubMed Central journal article supplement (PMC6682735)
Supplement: supp_RA119.009162_152555_1_supp_344796_psr6dd.pdf [file supp_RA119.009162_152555_1_supp_344796_psr6dd.pdf]

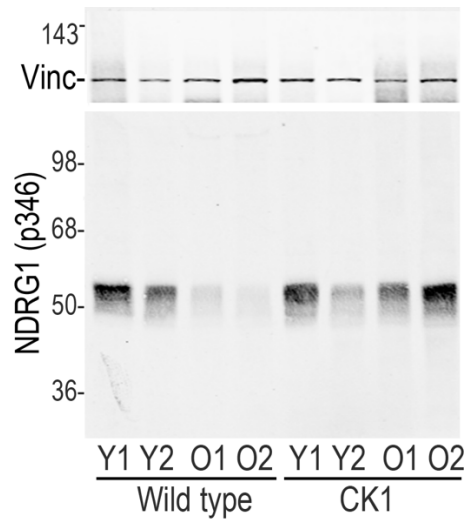

Supplementary Figure: Older (O) WT animals show lower levels of NDRG1 phosphorylated at S346 than younger WT or both old and young (Y) Cx43<sup>CK1</sup>.
